# Supplementary material for: Analysis of raindrop size distribution from the double moment cloud microphysics scheme for monsoon over a tropical station
Source: Copernicus journal article supplement (doi:10.5194/egusphere-2024-3538), 2024-12-16
Supplement: Supplementary file [file egusphere-2024-3538-AC1-supplement.pdf]

Thank you for your comment. In response, we have conducted an analysis to assess the impact of truncation on the mass-weighted mean diameter ( $D_m$ ). Our approach follows the CASIM particle size distribution (PSD) framework, where  $D_m$  is derived as the ratio of the 4th and 3rd moments. By utilizing the regularized incomplete gamma function, we quantify the truncation effect at  $D_{cut}$ , corresponding to the lowest size detected by JWD. The results indicate that while individual moments are affected by truncation, their ratio remains largely unchanged. Since our histograms of  $D_m$  already start above 0.5 mm, the bias introduced by truncation is minimal, and hence the shape parameter ( $\mu$ ) remains unaffected or realistic. These findings suggest that discrepancies between JWD and model-derived  $D_m$  are negligible due to truncation and the analysis discussed in the manuscript remain valid.

The CASIM particle size distribution definition is

$$N(D) = N \frac{\lambda^{1+\mu}}{\Gamma(1+\mu)} D^\mu \exp(-\lambda D) \quad (1)$$

where  $N$  is the total number concentration and  $\lambda, \mu$  are PSD parameters.

The  $p$ -th moment of this distribution is given by

$$M(p) = \frac{N\Gamma(1+\mu+p)}{\lambda^p\Gamma(1+\mu)} \quad (2)$$

The mass-weighted mean size is given by the ratio of the 4th and 3rd moments for liquid droplets:

$$D_m = \frac{M(4)}{M(3)} \quad (3)$$

We will use the regularized incomplete upper gamma function (`scipy.special.gammaincc`) from the Python `scipy.stats` library to estimate the moments used to compute the mass-weighted mean diameter  $D_m$ , assuming that  $\mu$  is fixed and the same for both truncated and full distributions.

$$Q(a, x) = \frac{1}{\Gamma(a)} \int_x^\infty t^{a-1} \exp(-t) dt \quad (4)$$

such that  $Q = 1$  when  $x = 0$ .

For the CASIM PSD, we define  $t = \lambda D$ ,  $a = \mu + 1 + p$  where  $p$  is the  $p$ -th moment ( $p = 0$ : number concentration,  $p = 3$ : mass concentration). The truncation is applied at  $x = \lambda D_{cut}$ , where  $D_{cut}$  is the lowest size observed by the JWD sensor.

To estimate the ratio of JWD-derived  $D_{m,jwd}$  to CASIM  $D_{m,mod}$ :

$$\frac{D_{m,jwd}}{D_{m,mod}} = \frac{Q(1+\mu+4, \lambda D_{cut})}{Q(1+\mu+3, \lambda D_{cut})} \quad (5)$$

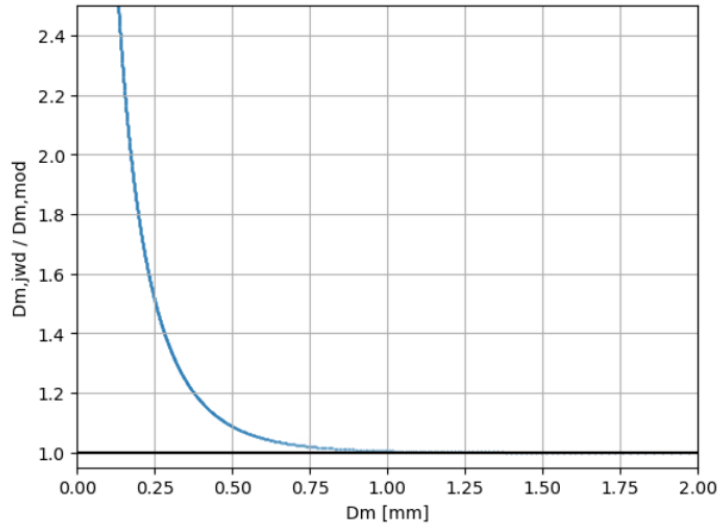

Figure 1: Scatter plot showing the ratio of JWD-derived mass-weighted mean diameter ( $D_{m,jwd}$ ) to the CASIM model-derived mass-weighted mean diameter ( $D_{m,mod}$ ) as a function of  $D_m$  (in mm)

The analysis shows that the effect of truncation on the mass-weighted mean diameter ( $D_m$ ) is minimal because both the third and fourth moments are truncated at similar rates. As a result, their ratio remains largely unchanged. While truncation significantly affects individual moments, their proportionality ensures that  $D_m$  is stable.

Given that the histograms of  $D_m$  already start at  $D_m \approx 0.5$  mm, this confirms that truncation does not introduce any valid bias. Consequently, since  $D_m$  remains unaffected, the shape parameter ( $\mu$ ) is also unlikely to be impacted.

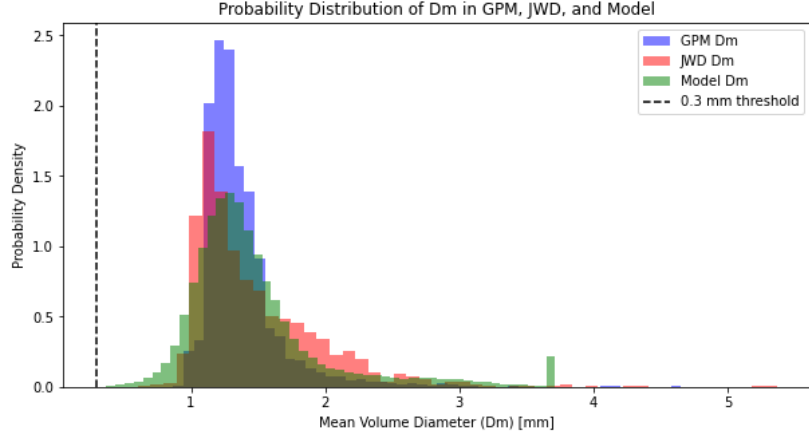

Figure 2: Histogram showing the probability density of drops in  $D_m$  size range

Thus, truncation does not concern the validity of the results. Furthermore, because the truncation has less than a 5% effect on  $D_m > 0.75$  mm, we can assert that  $\mu$  should also remain unaffected.
